# Supplementary material for: Disparities in Mortality Trends for Infants of Teenagers: 1996 to 2019
Source: Oxford University Press journal article supplement (doi:10.1542/peds.2022-060512), 2023-04-10
Supplement: peds_2022060512supplementarydata.pdf [file peds_2022060512supplementarydata.pdf]

## Supplemental Information

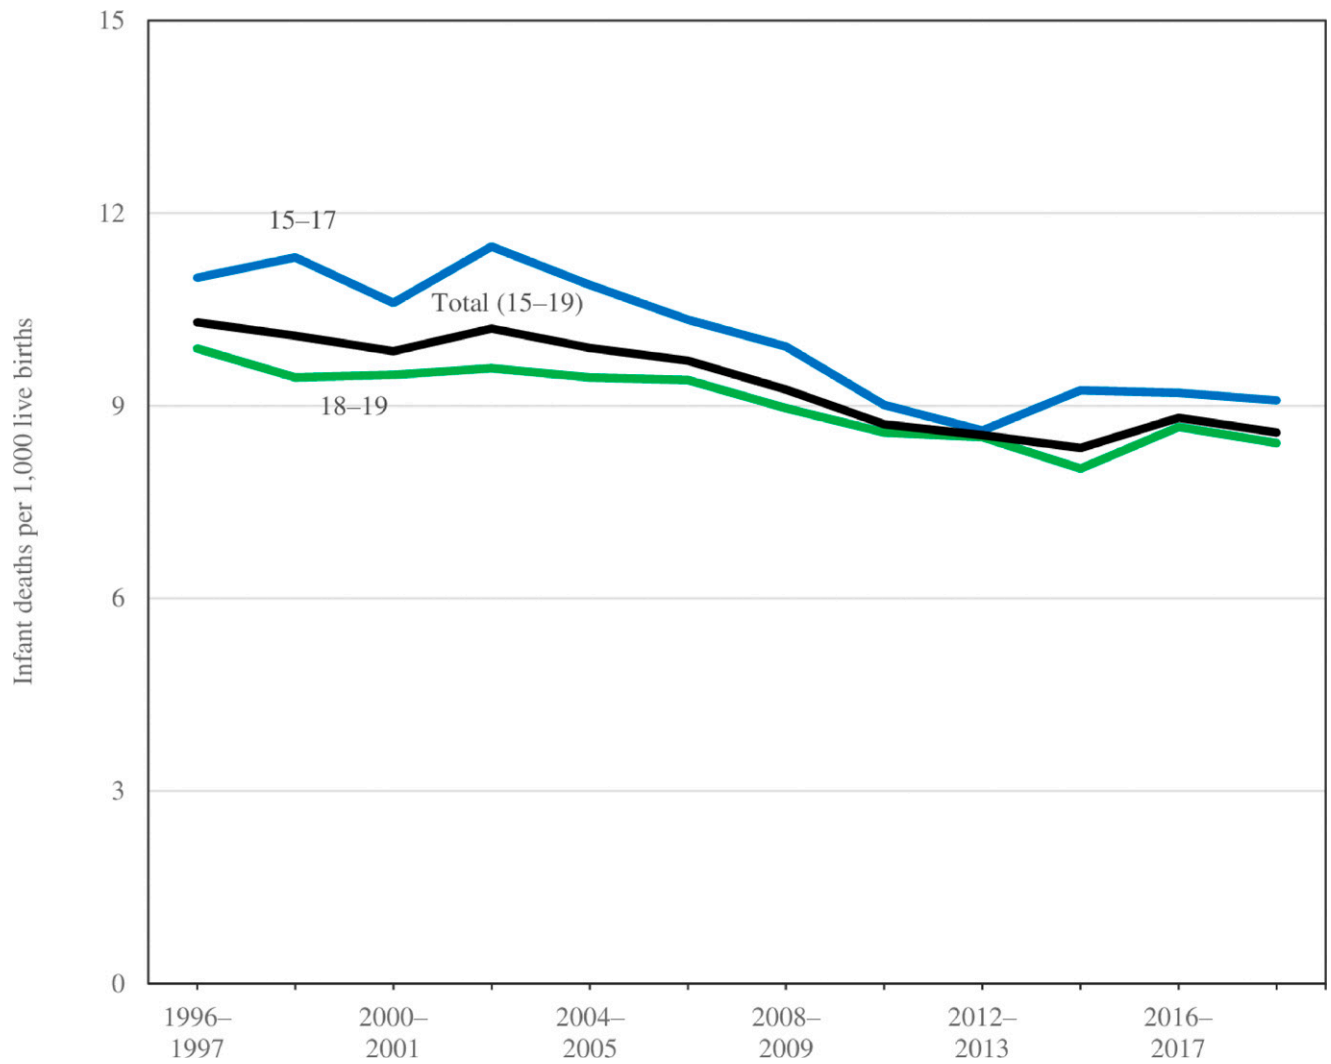

### SUPPLEMENTAL FIGURE 4

Trends in mortality rates for infants of teens aged 15 to 19 (total), 15 to 17, and 18 to 19: United States, 1996–1997 through 2018–2019. Source: NCHS, NVSS, linked birth and infant death file.

**SUPPLEMENTAL TABLE 4** Number of Deaths and Mortality Rates for Infants Born to Teens Aged 15 to 19 by Maternal Age Group, Maternal Urbanization Level, and Maternal Race and Ethnicity: United States, 1996–1997 and 2018–2019

| Characteristic                   | 1996–1997                            |                  |                    | 2018–2019                            |                  |                    |
|----------------------------------|--------------------------------------|------------------|--------------------|--------------------------------------|------------------|--------------------|
|                                  | Infant Deaths, <sup>a</sup> <i>n</i> | Births, <i>n</i> | Rate <sup>b</sup>  | Infant Deaths, <sup>a</sup> <i>n</i> | Births, <i>n</i> | Rate <sup>b</sup>  |
| Aged 15–19                       |                                      |                  |                    |                                      |                  |                    |
| Large central counties           |                                      |                  |                    |                                      |                  |                    |
| White, non-Hispanic              | 743                                  | 74 683           | 9.95               | 120                                  | 14 096           | 8.51               |
| Black, non-Hispanic              | 1549                                 | 111 066          | 13.95 <sup>c</sup> | 392                                  | 30 919           | 12.68 <sup>c</sup> |
| Hispanic or Latina               | 842                                  | 119 860          | 7.02 <sup>d</sup>  | 310                                  | 51 082           | 6.07 <sup>d</sup>  |
| Large fringe counties            |                                      |                  |                    |                                      |                  |                    |
| White, non-Hispanic              | 741                                  | 86 360           | 8.58               | 182                                  | 23 299           | 7.81               |
| Black, non-Hispanic              | 520                                  | 37 535           | 13.85 <sup>c</sup> | 153                                  | 13 657           | 11.20 <sup>c</sup> |
| Hispanic or Latina               | 223                                  | 28 628           | 7.79               | 126                                  | 22 561           | 5.58 <sup>d</sup>  |
| Medium and small counties        |                                      |                  |                    |                                      |                  |                    |
| White, non-Hispanic              | 1607                                 | 148 096          | 10.85              | 453                                  | 49 130           | 9.22               |
| Black, non-Hispanic              | 1028                                 | 67 973           | 15.12 <sup>c</sup> | 282                                  | 26 144           | 10.79              |
| Hispanic or Latina               | 491                                  | 66 472           | 7.39 <sup>d</sup>  | 283                                  | 41 636           | 6.80 <sup>d</sup>  |
| Rural counties                   |                                      |                  |                    |                                      |                  |                    |
| White, non-Hispanic              | 1207                                 | 81 371           | 14.83              | 339                                  | 34 080           | 9.95               |
| Black, non-Hispanic <sup>e</sup> | 453                                  | 33 127           | 13.67              | 132                                  | 9541             | 13.84 <sup>c</sup> |
| Hispanic or Latina <sup>e</sup>  | 152                                  | 18 958           | 8.02 <sup>d</sup>  | 104                                  | 12 497           | 8.32               |
| Aged 15–17                       |                                      |                  |                    |                                      |                  |                    |
| Large central counties           |                                      |                  |                    |                                      |                  |                    |
| White, non-Hispanic              | 275                                  | 24 650           | 11.16              | 21                                   | 2823             | 7.44               |
| Black, non-Hispanic <sup>e</sup> | 641                                  | 47 253           | 13.57 <sup>c</sup> | 103                                  | 8081             | 12.75 <sup>c</sup> |
| Hispanic or Latina               | 381                                  | 48 765           | 7.81 <sup>d</sup>  | 96                                   | 14 038           | 6.84               |
| Large fringe counties            |                                      |                  |                    |                                      |                  |                    |
| White, non-Hispanic <sup>e</sup> | 273                                  | 28 796           | 9.48               | 39                                   | 4461             | 8.74               |
| Black, non-Hispanic <sup>f</sup> | 220                                  | 15 614           | 14.09 <sup>c</sup> | 29                                   | 3328             | 8.71               |
| Hispanic or Latina               | 107                                  | 11 329           | 9.44               | 35                                   | 5990             | 5.84               |
| Medium and small counties        |                                      |                  |                    |                                      |                  |                    |
| White, non-Hispanic <sup>e</sup> | 599                                  | 53 736           | 11.15              | 114                                  | 10 252           | 11.12              |
| Black, non-Hispanic              | 438                                  | 28 641           | 15.29 <sup>c</sup> | 71                                   | 6758             | 10.51              |
| Hispanic or Latina <sup>e</sup>  | 215                                  | 27 510           | 7.82 <sup>d</sup>  | 85                                   | 11 769           | 7.22               |
| Rural counties                   |                                      |                  |                    |                                      |                  |                    |
| White, non-Hispanic <sup>e</sup> | 419                                  | 39 452           | 10.62              | 86                                   | 8742             | 9.84               |
| Black, non-Hispanic <sup>e</sup> | 200                                  | 14 257           | 14.03 <sup>c</sup> | 35                                   | 2565             | 13.65              |
| Hispanic or Latina <sup>e</sup>  | 64                                   | 8047             | 7.95               | 30                                   | 3477             | 8.63               |
| Aged 18–19                       |                                      |                  |                    |                                      |                  |                    |
| Large central counties           |                                      |                  |                    |                                      |                  |                    |
| White, non-Hispanic <sup>e</sup> | 468                                  | 50 033           | 9.35               | 99                                   | 11 273           | 8.78               |
| Black, non-Hispanic              | 909                                  | 63 813           | 14.24 <sup>c</sup> | 290                                  | 22 838           | 12.70 <sup>c</sup> |
| Hispanic or Latina               | 461                                  | 71 095           | 6.48 <sup>d</sup>  | 213                                  | 37 044           | 5.75 <sup>d</sup>  |
| Large fringe counties:           |                                      |                  |                    |                                      |                  |                    |
| White, non-Hispanic <sup>e</sup> | 468                                  | 57 564           | 8.13               | 143                                  | 18 838           | 7.59               |
| Black, non-Hispanic              | 300                                  | 21 921           | 13.69 <sup>c</sup> | 124                                  | 10 329           | 12.01 <sup>c</sup> |
| Hispanic or Latina <sup>e</sup>  | 115                                  | 17 299           | 6.65               | 91                                   | 16 571           | 5.49 <sup>d</sup>  |
| Medium and small counties        |                                      |                  |                    |                                      |                  |                    |
| White, non-Hispanic <sup>e</sup> | 1008                                 | 108 644          | 9.28               | 338                                  | 40 388           | 8.37               |
| Black, non-Hispanic              | 590                                  | 39 332           | 15.00 <sup>c</sup> | 210                                  | 19 386           | 10.83 <sup>c</sup> |
| Hispanic or Latina <sup>e</sup>  | 277                                  | 38 962           | 7.11 <sup>d</sup>  | 198                                  | 29 867           | 6.63 <sup>d</sup>  |
| Rural counties                   |                                      |                  |                    |                                      |                  |                    |
| White, non-Hispanic              | 788                                  | 81 371           | 9.68               | 254                                  | 34 080           | 7.45               |
| Black, non-Hispanic <sup>e</sup> | 253                                  | 18 870           | 13.41 <sup>c</sup> | 97                                   | 6976             | 13.90 <sup>c</sup> |
| Hispanic or Latina <sup>e</sup>  | 88                                   | 10 911           | 8.07               | 75                                   | 9020             | 8.31               |

<sup>a</sup> The number of infant deaths in the linked file are weighted to equal the sum of the linked plus unlinked infant deaths by age at death and state. The number of infant deaths shown in this table have been rounded to the nearest integer.

<sup>b</sup> Infant deaths per 1000 live births. All rates declined significantly throughout the period unless otherwise noted.

<sup>c</sup> Significantly higher than rates for infants of white, non-Hispanic and Hispanic teens.

<sup>d</sup> Significantly lower than rates for infants of white, non-Hispanic and Black, non-Hispanic teens.

<sup>e</sup> Rates did not significantly change during the period.

<sup>f</sup> Rates did not significantly change from 1996–1997 through 2002–2003 and then declined from 2002–2003 through 2018–2019.
